# Supplementary material for: High resolution simulations reveal a large loss of Fennoscandian tundra due to climate change
Source: Copernicus journal article supplement (doi:10.5194/bg-2023-148), 2023-09-12
Supplement: Supplementary file 1 [file bg-2023-148-supplement.pdf]

1

## 2 Content

| 3  |                                                                                      | Page  |
|----|--------------------------------------------------------------------------------------|-------|
| 4  | S1. Maps of hotspots                                                                 | 2     |
| 5  | S2. LPJ-Guess parameters tuned for the IBS plant functional type                     | 3     |
| 6  | S3. Description of the reindeer grazing, browsing and trampling implementation       | 4-5   |
| 7  | S4. Climate-change signal in the climate scenario                                    | 6     |
| 8  | S5. Description of conversion of PFT LAI to vegetation classes                       | 7-8   |
| 9  | S6. Validation results                                                               | 9-11  |
| 10 | S7. Confusion matrixes for simulated and satellite-based vegetation classes:         |       |
| 11 | a. Abisko                                                                            | 12    |
| 12 | b. Vindeln                                                                           | 13    |
| 13 | c. Helags                                                                            | 14    |
| 14 | d. Fulu                                                                              | 15    |
| 15 | e. Muddus                                                                            | 16    |
| 16 | f. Björnlandet                                                                       | 17    |
| 17 | S8. Simulated potential reindeer consumption in Swedish reindeer-herding communities | 18-19 |
| 18 |                                                                                      |       |
| 19 |                                                                                      |       |

20 S1. Maps of hotspots

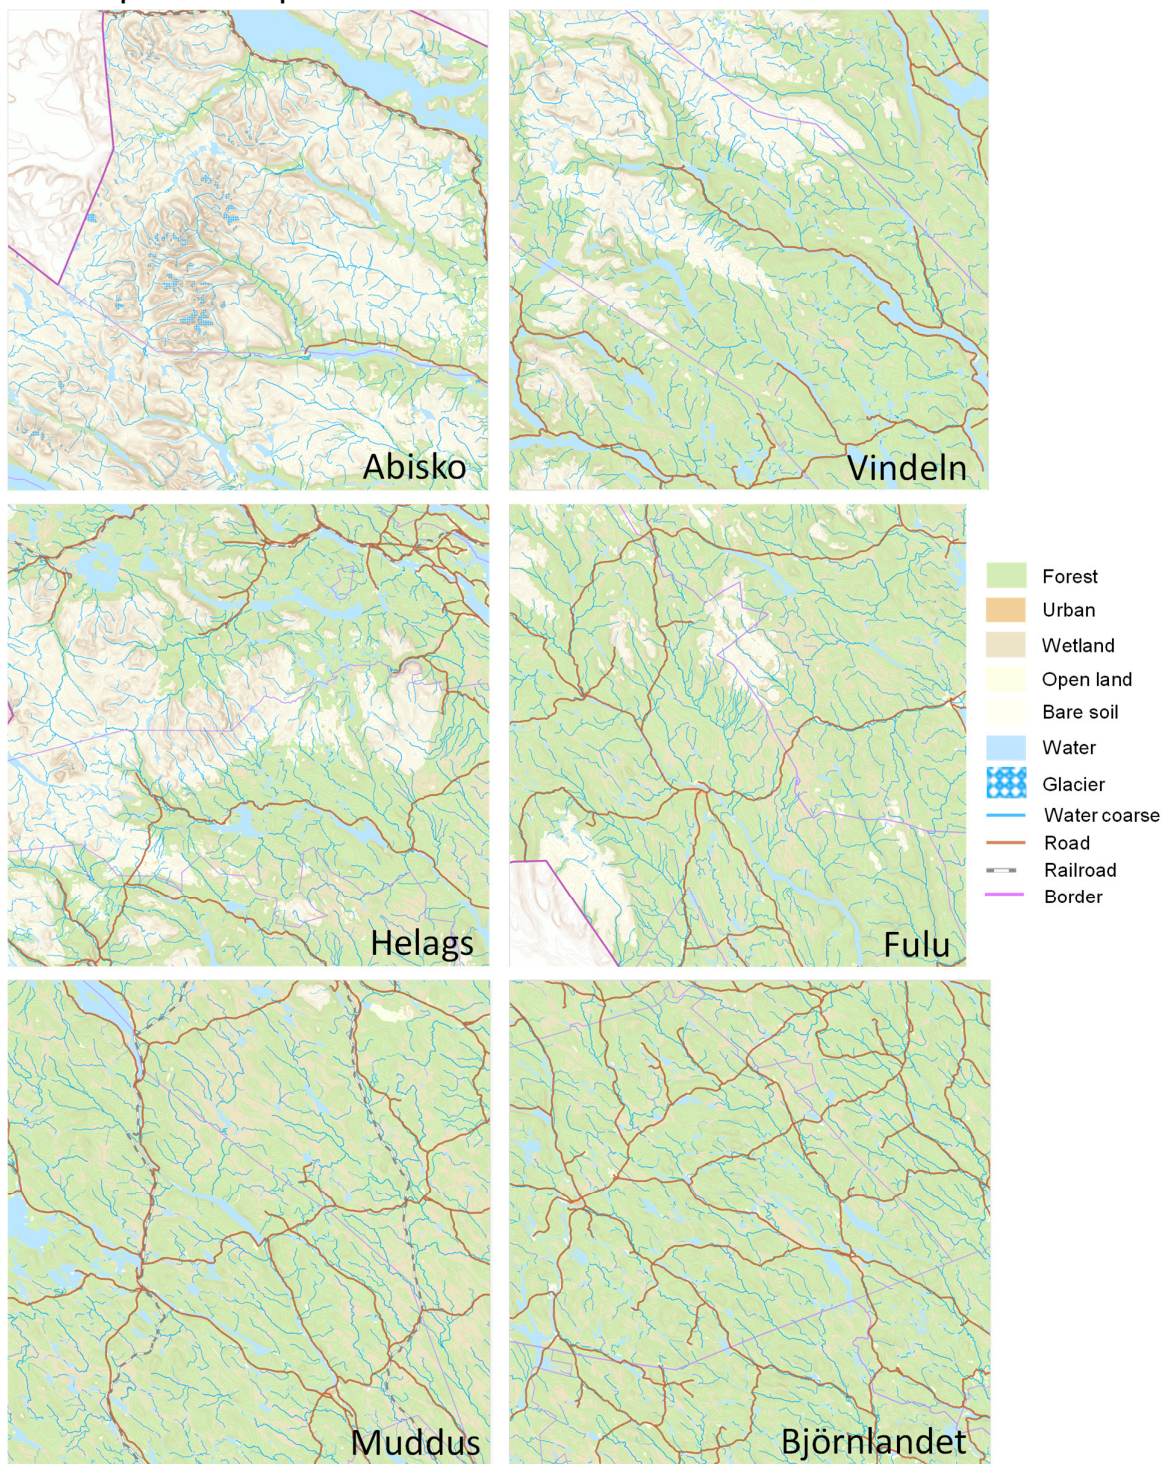

21  
22 **Figure S1.** Maps of the six hotspots (90 × 90 km) from Lantmäteriet (The overview map, open data  
23 license Creative Commons, (CC0), <https://www.lantmateriet.se/en/>).

24

25 **S2. LPJ-Guess parameters tuned for the IBS plant functional type**

26 **Table S2.** Parameters for the shade-intolerant Broadleaved Summergreen tree plant functional type  
 27 (IBS), which represents the mountain birch (*Betula pubescens* ssp. *tortuosa*), that were changed  
 28 compared to the original LPJ-Guess 4.1 parameterization.

| Parameter     | Original value | New value | Unit           | Explanation                                                                                            |
|---------------|----------------|-----------|----------------|--------------------------------------------------------------------------------------------------------|
| alphar        | 11             | 5         | -              | Shape parameter capturing non-linearity in recruitment rate relative to understorey growing conditions |
| turnover_sap  | 0.1            | 0.075     | fraction/year  | Sapwood turnover                                                                                       |
| crownarea_max | 50             | 27.3      | m <sup>2</sup> | Maximum tree crown area                                                                                |
| k_latosa      | 6000           | 4000      | -              | Leaf to sapwood area ratio                                                                             |
| k_allom1      | 250            | 200       |                | Allometric parameter (crownarea = k_allom1 × diam <sup>1.6</sup> )                                     |
| k_allom2      | 60             | 30        |                | Allometric parameter (height = k_allom2 × diameter <sup>0.6</sup> )                                    |
| gdd5min_est   | 350            | 250       | °C day         | Minimum growing degree days for establishment, with 5 °C limit                                         |
| phengdd5ramp  | 200            | 75        | °C day         | Growing degree days, with 5 °C limit, to attain full leaf cover                                        |
| gdd0_min      | 0              | 450       | °C day         | Minimum growing degree days for establishment, with 0 °C limit                                         |
| longevity     | 300            | 220       | years          | Expected lifetime longevity under non-stressed conditions                                              |

29

30

### 31 S3. Description of the reindeer grazing, browsing and trampling 32 implementation

33

34 A new function (grazebrowse), which reduce leaf biomass and kills a fraction of the plants, was  
35 added to LPJ-Guess code to represent reindeer grazing/browsing and trampling. The reduction of  
36 leaf biomass was done for all cohorts at patch level with a specified interval (visit\_int, set to three  
37 years) after a check that the cohort is below a height that enables reindeer access to its canopy  
38 (height\_max, set to 2.5 m). A three-year visit\_int can be motivated from the size of the Swedish land  
39 area with reindeer herding (225 000 km<sup>2</sup>, [www.sametinget.se/rennaring\\_sverige](http://www.sametinget.se/rennaring_sverige)), the population  
40 (225 000 – 280 00 animals in winter, [www.sametinget.se/rennaring\\_sverige](http://www.sametinget.se/rennaring_sverige)), the area represented  
41 by a path (1000 m<sup>2</sup>) and assuming that an animal eat one day a year per visited patch, which gives  
42 roughly a return time of 2-3 years ( $225 \times 10^9 \text{ m}^2 / (250 \times 10^3 \text{ animals} \times 1000 \text{ m}^2 \text{ patch}^{-1} \times 1 \text{ patch day}^{-1}$   
43  $\text{animal}^{-1} \times 365 \text{ days year}^{-1}) = 2.5 \text{ years}$ ). The fraction of the leaf biomass that is consumed in a year  
44 with reindeers visiting the patch (harv\_frac, unitless) was calculated as:

$$45 \text{ harv\_frac} = \text{visit\_int} \times \text{browse\_pref} \times \text{herbivore\_int}$$

46 where browse\_pref (unitless) is a PFT specific parameter that describes how large fraction of a PFT  
47 that is consumed relative to the availability of the PFT and the total consumption, and herbivore\_int  
48 (yr<sup>-1</sup>) is the relative herbivore intensity (i.e. the fraction of leaf mass on average removed per year, if  
49 it is reachable, with a browse\_pref of 1). Preference values for reindeer were obtained from  
50 extensive observations of Caribou grazing and browsing in Canada (Denryter et al., 2017) (Table 1).  
51 Though the species are different in North America compared to Fennoscandia, it was assumed that  
52 the North American species were representative at the genus level.

53 All harvested carbon entered the harvest pool but only a fraction of the consumed leaf N  
54 (N\_browseharvest\_scale, set to 0.35). The remaining part of consumed N was maintained in the  
55 cohort's leaf N pool, which is functionality that represents the assumption that N leaving the  
56 herbivore as urine is directly taken up by the plants. Ferraro et al. (2022), in their modelling study of  
57 caribou population dynamics, used a fraction of 38% of N that is released as egestion the day after  
58 consumption and that some of the remaining part is released as excretion based on the range  
59 reported by McEwan and Whitehead (1970).

60 A fraction of the biomass (grass PFT types) or number of individuals (tree and shrub PFTs) was killed  
61 annually to represent the effect of trampling. The fraction (trampled) was calculated as:

$$62 \text{ trampled} = \text{visit\_int} \times \text{tramp\_frac} \times \text{herbivore\_int}$$

63 where tramp\_frac (unitless) is a PFT specific parameter corresponding to the fraction of individuals  
64 killed (or biomass killed for grass) per year with a herbivore\_int of 1. A maximum value of trampled  
65 is currently set to 95%. The "tramp\_frac" values (Table 1) are based on the vegetation response in an  
66 artificial trampling experiment (Egelkraut et al., 2020).

67

68 **Table S3.** The new PFT-parameters browse\_pref and tramp\_frac. The browse\_pref values are based  
 69 on the Denryter et al. (2017) study. An average of reported Ivlev's electivity indexes (IEI) was first  
 70 achieved from reported values for relevant individual species and then "preference" was calculated  
 71 as  $(1 + IEI)/(1 - IEI)$ .

| pft             | Species used for calculating the mean of Ivlev's electivity indexes                                                                                         | IEI    | browse_pref | tramp_frac |
|-----------------|-------------------------------------------------------------------------------------------------------------------------------------------------------------|--------|-------------|------------|
| BNE             | <i>Picea mariana</i> , <i>P. glauca</i> , <i>P. Engelmannii</i>                                                                                             | -0.9   | 0.053       | 0          |
| BINE            | <i>Pinus contorta</i>                                                                                                                                       | -0.94  | 0.031       | 0          |
| IBS             | <i>Betula papyrifera</i> (0.82), <i>Populus tremuloides</i> (0.44),<br><i>Alnus crispa</i> (0.66)                                                           | 0.64   | 4.6         | 0          |
| TeBS            | No data                                                                                                                                                     | 0.5    | 3.0         | 0          |
| C3G,<br>C3G_wet | Weighted mean of all grasses (weighted by number<br>of observed grazing events for the different species)                                                   | -0.176 | 0.70        | 0.1        |
| HSE             | <i>Juniperus communis</i> (-1)                                                                                                                              | -0.99  | 0.005       | 0.01       |
| HSS             | <i>Alnus crispa</i> (0.66), <i>Salix</i> sp (0.72), <i>Betula glandulosa</i><br>(0.4)                                                                       | 0.65   | 4.7         | 0.01       |
| LSE,<br>pLSE    | <i>Vaccinium vitis-idea</i> , <i>Empetrum</i> has higher score but<br>that is because its berries are eaten                                                 | -0.72  | 0.16        | 0.15       |
| LSS,<br>pLSS    | <i>Vaccinium myrtilloides</i> (0.65), <i>Vaccinium uliginosum</i><br>(0.59), <i>Salix</i> sp (0.72)                                                         | 0.65   | 4.7         | 0.15       |
| GRT,<br>WetGRS  | Calculated from Table 2&3 for forbes, grasses and<br>graminoid nongrasses                                                                                   | -0.2   | 0.67        | 0.1        |
| EPDS            | <i>Vaccinium oxycoccus</i> (-0.88), <i>Cassiope mertensiana</i> (-<br>0.67), <i>Dryas octopetala</i> (-0.28), <i>Saxifraga</i><br><i>oppositifolia</i> (-1) | -0.71  | 0.17        | 0.2        |
| SPDS            | <i>Salix reticulata</i> (-0.82), <i>Arctostaphylos rubra</i> (-0.26)                                                                                        | -0.54  | 0.30        | 0.2        |
| CLM,<br>pCLM    | <i>Saxifragaceae</i> (-1), <i>Caryophyllaceae</i> (-0.9), lichens<br><i>Cladina</i> and <i>Cladonia</i> sp (0.55), mosses (-1)                              | -0.59  | 0.26        | 0.1        |
| pmoss           | Various spp.                                                                                                                                                | -1     | 0.0         | 0.1        |

72

### 73 **References**

- 74 Denryter, K.A., Cook, R.C., Cook, J.G. and Parker, K.L., 2017. Straight from the caribou's (*Rangifer*  
 75 *tarandus*) mouth: detailed observations of tame caribou reveal new insights into summer-  
 76 autumn diets. *Canadian Journal of Zoology*, 95: 81-94.
- 77 Egelkraut, D., Barthelemy, H. and Olofsson, J., 2020. Reindeer trampling promotes vegetation  
 78 changes in tundra heathlands: Results from a simulation experiment. *Journal of Vegetation*  
 79 *Science*, 31: 476-486.
- 80 Ferraro, K.M., Schmitz, O.J. and McCary, M.A., 2022. Effects of ungulate density and sociality on  
 81 landscape heterogeneity: a mechanistic modeling approach. *Ecography*, 2022: e06039.
- 82 McEwan, E.H. and Whitehead, P.E., 1970. Seasonal changes in the energy and nitrogen intake in  
 83 reindeer and caribou. *Canadian Journal of Zoology*, 48: 905-913.

84

85 S4. Climate-change signal in the climate scenario

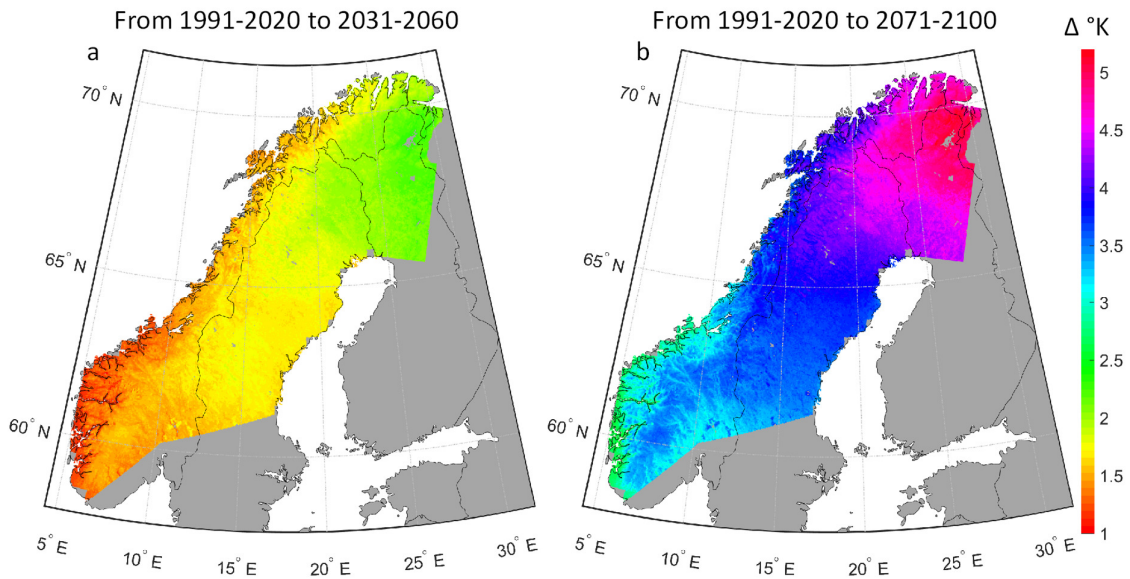

86

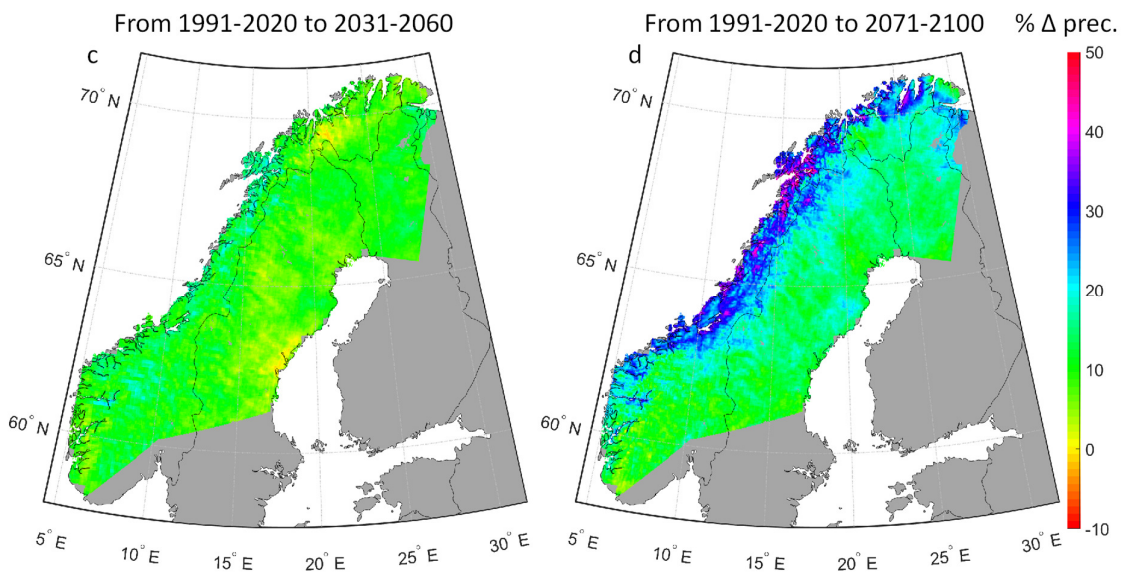

87

88 **Figure S4.** Change in mean annual air temperature (a, b) and relative change in annual precipitation  
89 (c, d) from the 1991-2020 to the 2031-2060 30-year periods (a, c) and from 1991-2020 to 2071-2100  
90 (b, d) for the constructed complete 1985-2100 RCP8.5 dataset used in the vegetation model  
91 simulations.

92

93 **S5. Description of conversion of PFT LAI to vegetation classes**

94 First gridcells classified as water according to the 2018 Corine vegetation map were set to water for  
 95 both GLCE and Corine, and gridcells with a wetland fraction (prescribed and constant over the  
 96 simulation period based on the PEATMAP product (Xu et al., 2018)) above 0.5 were set to “Peat  
 97 bogs” and “Bogs and marches” for GLCE and Corine respectively. The rest of the classification was  
 98 based on simulated LAI of the different PFTs, using these sums and fractions:

- 99 totalLAI: sum of all PFTs’ LAI
- 100 forestLAI: sum of all tree PFTs’ LAI (BNE, BINE, IBS, TeBS)
- 101 conLAIfrac: sum of conifer tree PFTs’ LAI divided by forestLAI
- 102 woodLAIfrac: forestLAI + tall shrub PFTs’ LAI divided by totalLAI
- 103 needleLAIwoodfrac: sum of conifer tree and shrub PFTs’ LAI divided by (forestLAI + tall shrub LAI)
- 104 shrubLAIfrac: sum of tall and short shrubs LAI divided by totalLAI
- 105 grassLAIfrac: sum of grass and forb PFTs’ LAI divided by total LAI excluding forestLAI and tall  
 106 shrub LAI
- 107 sedgaLAIfrac: sum of short shrubs, graminoid and forb tundra and flood tolerant grass PFTs LAI  
 108 divided by totalLAI
- 109 CLMgrassLAIfrac: graminoid and forb tundra, cushion forb, lichen and moss tundra and flood  
 110 tolerant grass PFTs LAI divided by totalLAI

111 These were then applied according to the FigS5a-b schemes below which are based on the  
 112 definitions in Bartalev et al. (2003) and Kosztra et al. (2019) for GLCE and Corine, respectively.

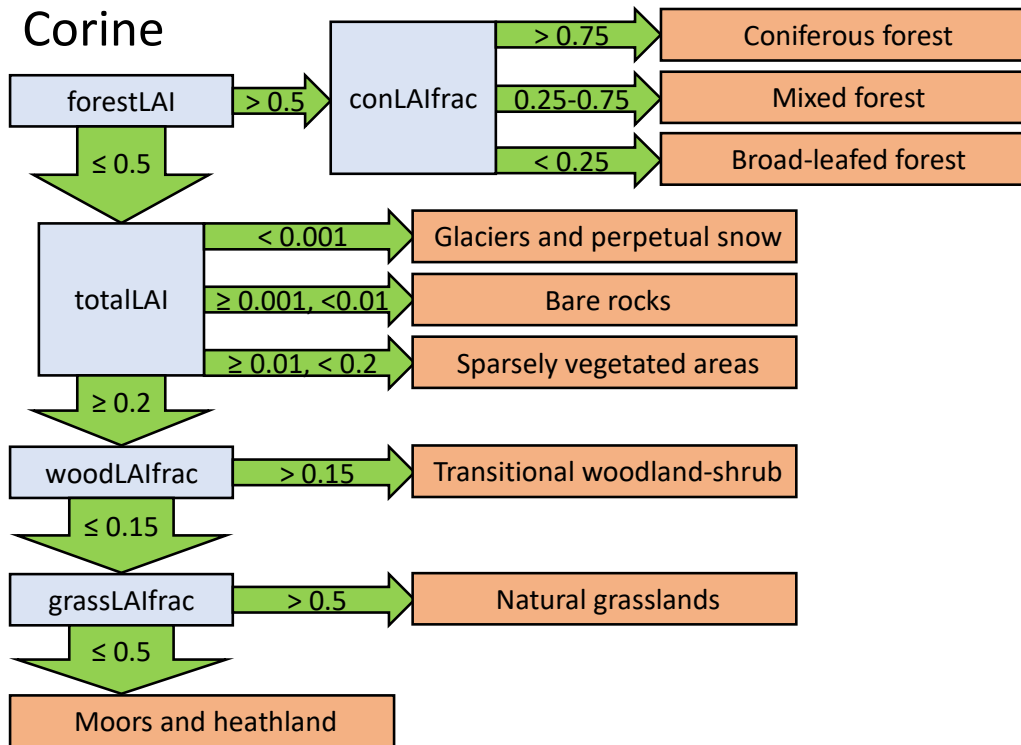

113

114 **Figure S5a.** Scheme for the vegetation classification according to Corine based on simulated LAI.

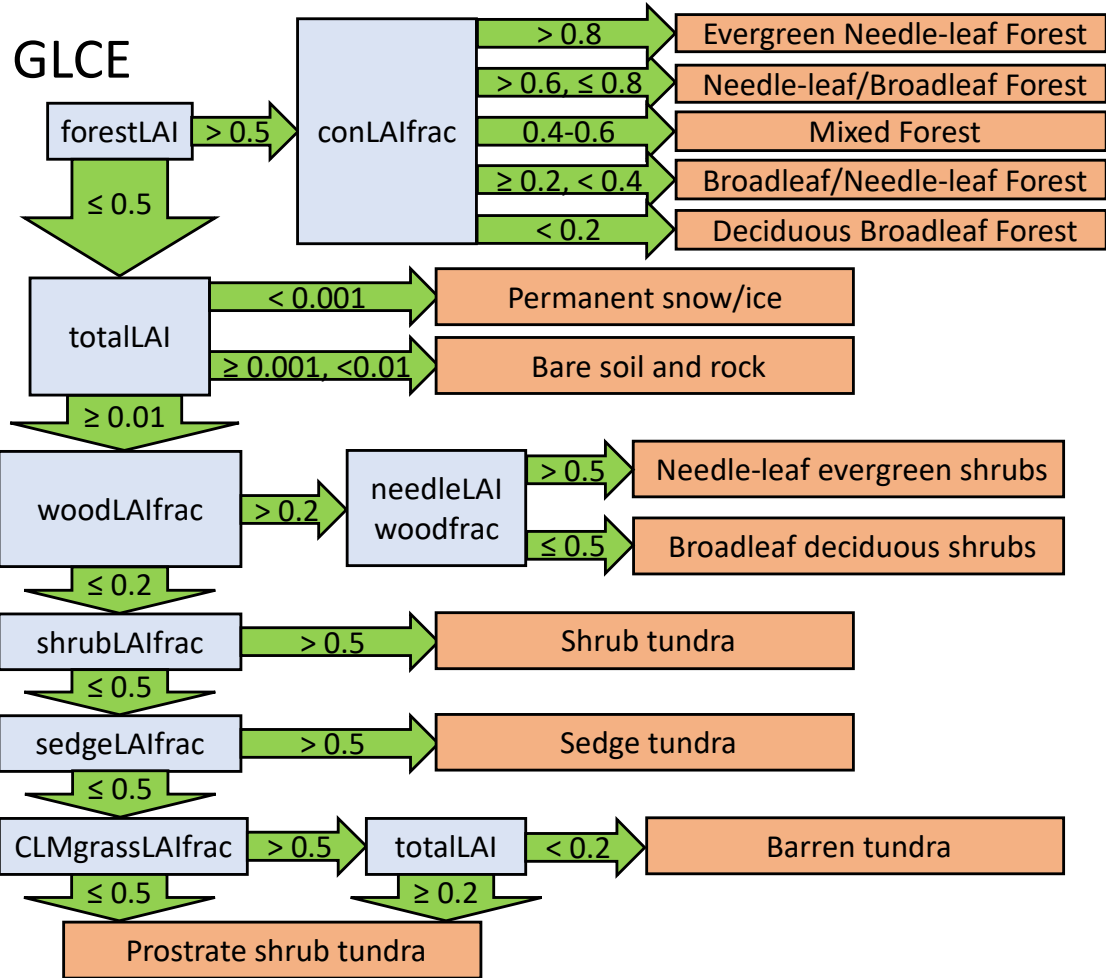

115

116 **Figure S5b.** Scheme for the vegetation classification according to GLCE based on simulated LAI.

117

118 **References**

119 Babst, F. et al., 2014. Above-ground woody carbon sequestration measured from tree rings is  
 120 coherent with net ecosystem productivity at five eddy-covariance sites. *New Phytologist*,  
 121 201(4): 1289-1303.  
 122 Kosztra, B., Büttner, G., Hazeu, G. and Arnold, S., 2019. Updated CLC illustrated nomenclature  
 123 guidelines, European Topic Centre on Urban, land and soil systems.  
 124 Xu, J., Morris, P.J., Liu, J. and Holden, J., 2018. PEATMAP: Refining estimates of global peatland  
 125 distribution based on a meta-analysis. *Catena*, 160: 134-140.

126

127



128 **S6. Validation results**

129 **Table S6a.** Confusion matrix for vegetation classification in 3x3 km gridcells, calculated using  
 130 simulation output for 1995-2004 compared to the satellite-based GLCE product for 2000. Classes  
 131 that were not simulated (e.g. cropland and urban) or prescribed (wetlands and water) were not  
 132 included. The overall accuracy was 32.4%. Merging data to broader classes gave: Forest user  
 133 accuracy 83.7%, Forest producer accuracy 89.6%, Shrub user accuracy 0.7%, Shrub producer  
 134 accuracy 17.1%, Tundra user accuracy 82.7%, Tundra producer accuracy 35.8%.

| LPJ-Guess classification | Evergreen Needle-leaf Forest | Deciduous Broadleaf Forest | Needle-leaf/Broadleaf Forest | Mixed Forest | Broadleaf/Needle-leaf Forest | Broadleaf deciduous shrubs | Needle-leaf evergreen shrubs | Prostrate shrub tundra | Sedge tundra | Shrub tundra | Bare soil and rock | Permanent snow/ice | Total        | User accuracy |
|--------------------------|------------------------------|----------------------------|------------------------------|--------------|------------------------------|----------------------------|------------------------------|------------------------|--------------|--------------|--------------------|--------------------|--------------|---------------|
| Sat. class.              |                              |                            |                              |              |                              |                            |                              |                        |              |              |                    |                    |              |               |
| E. NL For.               | 16129                        | 1320                       | 5454                         | 4357         | 2270                         | 187                        | 483                          | 110                    | 213          | 0            | 0                  | 0                  | 30523        | 72.9%         |
| D. BL For.               | 2433                         | 99                         | 351                          | 193          | 120                          | 24                         | 84                           | 21                     | 72           | 0            | 2                  | 0                  | 3399         | 2.1%          |
| NL/BL For.               | 607                          | 14                         | 254                          | 158          | 65                           | 0                          | 4                            | 1                      | 5            | 0            | 0                  | 0                  | 1108         | 3.9%          |
| M. For.                  | 314                          | 19                         | 112                          | 66           | 26                           | 0                          | 4                            | 0                      | 5            | 0            | 0                  | 0                  | 546          | 1.3%          |
| BL/NL For.               | 98                           | 3                          | 77                           | 56           | 15                           | 1                          | 4                            | 0                      | 1            | 0            | 0                  | 0                  | 255          | 0.5%          |
| BL D. shr.               | 165                          | 16                         | 8                            | 2            | 5                            | 28                         | 26                           | 9                      | 45           | 0            | 0                  | 0                  | 304          | 0.5%          |
| NL e. shr.               | 7                            | 2                          | 0                            | 1            | 1                            | 0                          | 1                            | 0                      | 6            | 0            | 0                  | 0                  | 18           | 0.0%          |
| Prost. shr. tundra       | 65                           | 62                         | 4                            | 3            | 0                            | 953                        | 110                          | 411                    | 1922         | 8            | 803                | 67                 | 4408         | 23.2%         |
| Sedge tundra             | 362                          | 597                        | 11                           | 10           | 10                           | 1251                       | 316                          | 301                    | 1445         | 3            | 56                 | 2                  | 4364         | 19.1%         |
| Shrub tundra             | 1830                         | 2618                       | 181                          | 156          | 262                          | 2757                       | 1077                         | 796                    | 2844         | 28           | 306                | 27                 | 12882        | 65.1%         |
| Bare soil and rock       | 125                          | 10                         | 2                            | 1            | 4                            | 212                        | 66                           | 124                    | 977          | 4            | 1347               | 425                | 3297         | 50.8%         |
| Perm. snow/ice           | 0                            | 0                          | 0                            | 0            | 0                            | 1                          | 0                            | 2                      | 27           | 0            | 136                | 66                 | 232          | 11.2%         |
| <b>Total</b>             | <b>22135</b>                 | <b>4760</b>                | <b>6454</b>                  | <b>5003</b>  | <b>2778</b>                  | <b>5414</b>                | <b>2175</b>                  | <b>1775</b>            | <b>7562</b>  | <b>43</b>    | <b>2650</b>        | <b>587</b>         | <b>61336</b> |               |
| <b>Prod. Acc.</b>        | <b>52.8%</b>                 | <b>2.9%</b>                | <b>22.9%</b>                 | <b>12.1%</b> | <b>5.9%</b>                  | <b>9.2%</b>                | <b>5.6%</b>                  | <b>9.3%</b>            | <b>33.1%</b> | <b>0.2%</b>  | <b>40.9%</b>       | <b>28.4%</b>       |              |               |

136 **Table S6b.** Confusion matrix for vegetation classification in 3x3 km gridcells, calculated using  
 137 simulation output for 2013-2022 compared to the satellite-based Corine product for 2018. Classes  
 138 that were not simulated (e.g. cropland and urban) or prescribed (wetlands and water) were not  
 139 included. The overall accuracy was 37.1%. Treating forest as one big class gave a user accuracy of  
 140 84.4% and producer accuracy 93.7%.

| LPJ-Guess classification | Broad-leaved forest | Coniferous forest | Mixed forest | Natural grasslands | Moors and heathland | Transitional woodland-shrub | Bare rocks | Sparsely vegetated areas | Glaciers and perpetual snow | Total | User accuracy |
|--------------------------|---------------------|-------------------|--------------|--------------------|---------------------|-----------------------------|------------|--------------------------|-----------------------------|-------|---------------|
| Satellite class.         |                     |                   |              |                    |                     |                             |            |                          |                             |       |               |
| BL forest                | 2150                | 2195              | 647          | 331                | 50                  | 1787                        | 2          | 32                       | 0                           | 7194  | 38.9%         |
| Con. forest              | 1542                | 17434             | 10848        | 10                 | 2                   | 212                         | 0          | 1                        | 0                           | 30049 | 69.0%         |
| Mixed forest             | 301                 | 1086              | 535          | 3                  | 0                   | 30                          | 0          | 0                        | 0                           | 1955  | 4.2%          |
| Natural grassl.          | 0                   | 0                 | 0            | 36                 | 3                   | 4                           | 4          | 43                       | 1                           | 91    | 0.7%          |
| Moors and heathl.        | 971                 | 1941              | 187          | 1622               | 377                 | 2834                        | 15         | 649                      | 5                           | 8601  | 17.6%         |
| Trans. woodl.-shrub      | 59                  | 779               | 337          | 1                  | 0                   | 2                           | 0          | 0                        | 0                           | 1178  | 0.0%          |
| Bare rocks               | 37                  | 90                | 14           | 704                | 54                  | 267                         | 618        | 700                      | 270                         | 2754  | 56.1%         |
| Sparsely veg. areas      | 465                 | 1731              | 182          | 2447               | 420                 | 2662                        | 321        | 1966                     | 165                         | 10359 | 57.4%         |
| Glac. & perp. snow       | 0                   | 1                 | 0            | 22                 | 0                   | 9                           | 141        | 37                       | 80                          | 290   | 15.4%         |
| Total                    | 5525                | 25257             | 12750        | 5176               | 906                 | 7807                        | 1101       | 3428                     | 521                         | 62471 |               |
| Producer accuracy        | 29.9%               | 58.0%             | 27.4%        | 39.6%              | 4.4%                | 0.2%                        | 22.4%      | 19.0%                    | 27.6%                       |       |               |

141

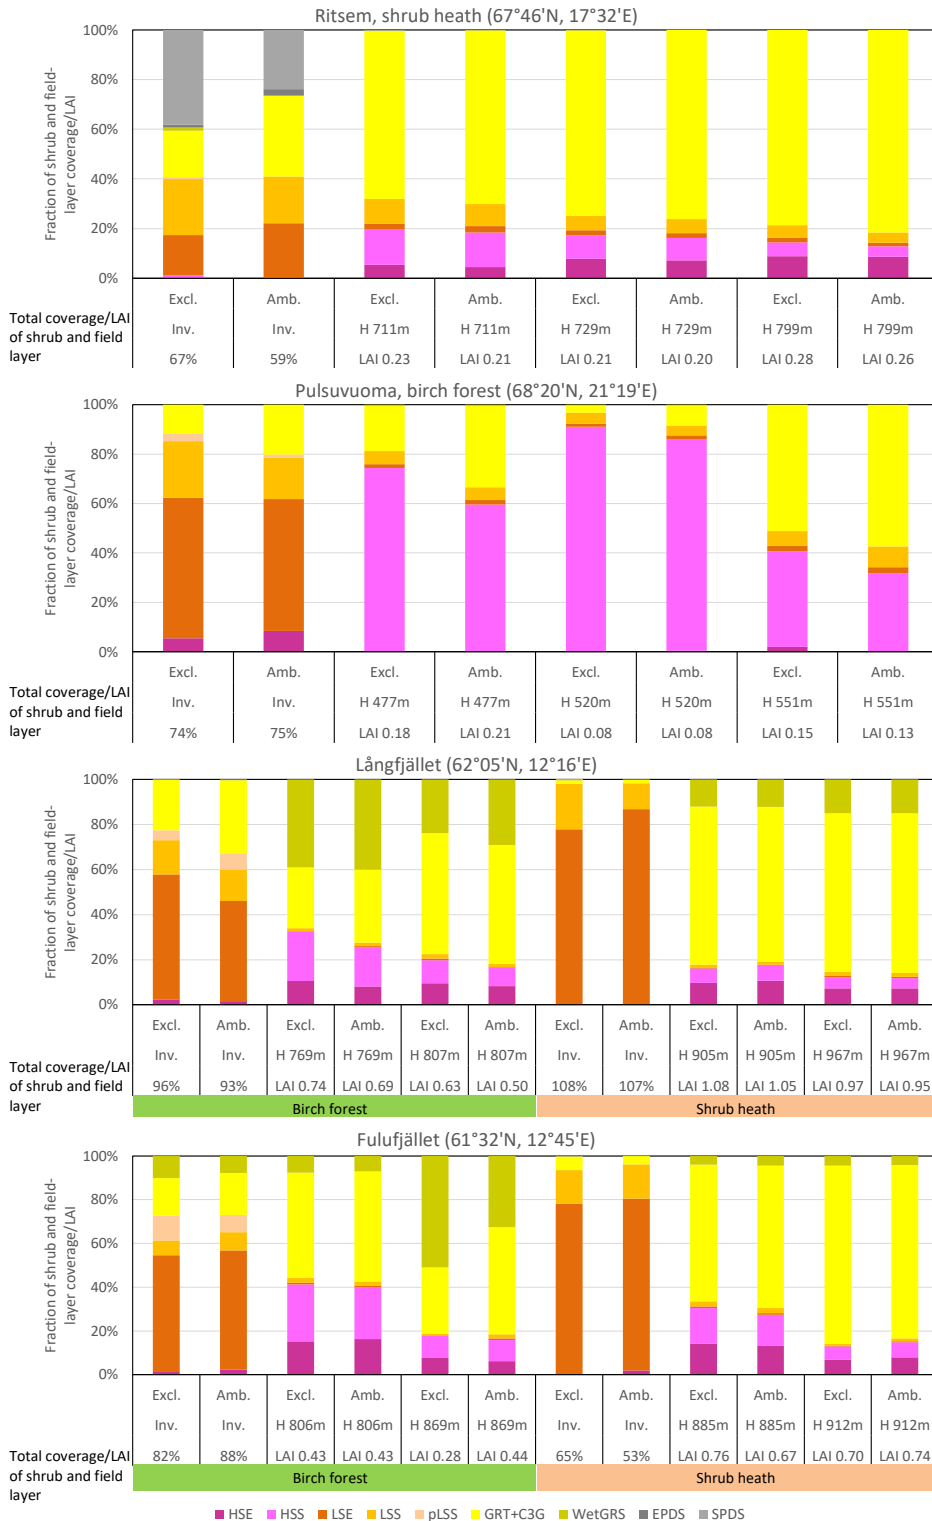

142

143 **Figure S6.** Composition of inventoried (coverage in 2011) and simulated (LAI mean 2009-2013) shrub  
 144 and field layer vegetation (see Table 1 for explanation of vegetation types) for four locations with  
 145 exclosure experiments in both/either birch forest and/or shrub heath (Vowles et al., 2017a), shown  
 146 for plots or simulations with reindeer excluded from 1995 or ambient with reindeer access.  
 147 Simulations were done for 2-3 gridcells with a representative range in altitude (H).

148 S7. Confusion matrixes for simulated and satellite-based vegetation  
 149 classes

150

151 **Table S7a.** Confusion matrix for vegetation classification in 3x3 km gridcells for a 90x90 km area  
 152 around Abisko, simulations for 1995-2004 compared to the satellite-based GLCE product for 2000  
 153 and simulations 2091-2100. Classes that were not simulated (e.g. cropland and urban) or prescribed  
 154 (wetlands and water) were not included. The total number of comparisons are higher for LPJ-GUESS  
 155 1995-2004 against 2091-2100 than for comparison with the satellite-based class, as cells with a  
 156 satellite-based class that was not simulated (e.g. urban) were filtered out in that comparison.

|                                |                  | LPJ-Guess simulation 1995-2004 |            |            |         |            |            |            |                  |            |            |                  |                |       |
|--------------------------------|------------------|--------------------------------|------------|------------|---------|------------|------------|------------|------------------|------------|------------|------------------|----------------|-------|
|                                |                  | E. NL For.                     | D. BL For. | NL/BL For. | M. For. | BL/NL For. | BL D. shr. | NL e. shr. | Prost. shr. tun. | Sedge tun. | Shrub tun. | Bare soil & rock | Perm. snow/ice | Total |
| Satellite-based class 2000     | E. NL For.       | 0                              | 7          | 0          | 0       | 5          | 1          | 0          | 0                | 0          | 0          | 0                | 0              | 13    |
|                                | D. BL For.       | 0                              | 0          | 0          | 0       | 0          | 0          | 0          | 0                | 0          | 0          | 0                | 0              | 0     |
|                                | NL/BL For.       | 0                              | 0          | 0          | 0       | 0          | 0          | 0          | 0                | 0          | 0          | 0                | 0              | 0     |
|                                | M. For.          | 0                              | 0          | 0          | 0       | 0          | 0          | 0          | 0                | 0          | 0          | 0                | 0              | 0     |
|                                | BL/NL For.       | 0                              | 0          | 0          | 0       | 0          | 0          | 0          | 0                | 0          | 0          | 0                | 0              | 0     |
|                                | BL D. shr.       | 0                              | 3          | 0          | 0       | 0          | 1          | 0          | 0                | 0          | 0          | 0                | 0              | 4     |
|                                | NL e. shr.       | 0                              | 0          | 0          | 0       | 0          | 0          | 0          | 0                | 0          | 0          | 0                | 0              | 0     |
|                                | Prost. shr. tun. | 0                              | 0          | 0          | 0       | 0          | 19         | 1          | 34               | 76         | 0          | 102              | 5              | 237   |
|                                | Sedge tun.       | 0                              | 1          | 1          | 0       | 0          | 43         | 0          | 30               | 28         | 0          | 1                | 0              | 104   |
|                                | Shrub tun.       | 0                              | 36         | 0          | 0       | 2          | 123        | 7          | 23               | 38         | 0          | 10               | 0              | 239   |
|                                | Bare soil & rock | 0                              | 0          | 0          | 0       | 1          | 3          | 0          | 4                | 37         | 0          | 140              | 23             | 208   |
| Perm. snow/ice                 | 0                | 0                              | 0          | 0          | 0       | 0          | 0          | 0          | 1                | 0          | 0          | 0                | 1              |       |
| Total                          | 0                | 47                             | 1          | 0          | 8       | 190        | 8          | 91         | 180              | 0          | 253        | 28               | 806            |       |
| LPJ-Guess simulation 2091-2100 | E. NL For.       | 0                              | 0          | 3          | 0       | 0          | 86         | 1          | 5                | 2          | 0          | 0                | 0              | 97    |
|                                | D. BL For.       | 0                              | 0          | 0          | 0       | 0          | 0          | 0          | 2                | 7          | 0          | 66               | 22             | 97    |
|                                | NL/BL For.       | 1                              | 7          | 0          | 1       | 3          | 22         | 2          | 1                | 0          | 0          | 0                | 0              | 37    |
|                                | M. For.          | 0                              | 33         | 0          | 0       | 7          | 10         | 0          | 0                | 0          | 0          | 0                | 0              | 50    |
|                                | BL/NL For.       | 0                              | 17         | 0          | 0       | 1          | 2          | 0          | 0                | 4          | 0          | 10               | 0              | 34    |
|                                | BL D. shr.       | 0                              | 0          | 0          | 0       | 0          | 0          | 0          | 0                | 6          | 0          | 37               | 3              | 46    |
|                                | NL e. shr.       | 0                              | 0          | 0          | 0       | 0          | 87         | 5          | 85               | 89         | 0          | 120              | 0              | 386   |
|                                | Prost. shr. tun. | 0                              | 0          | 0          | 0       | 0          | 0          | 0          | 0                | 0          | 0          | 12               | 2              | 14    |
|                                | Sedge tun.       | 0                              | 0          | 0          | 0       | 0          | 0          | 0          | 1                | 76         | 0          | 9                | 1              | 87    |
|                                | Shrub tun.       | 0                              | 0          | 0          | 0       | 0          | 0          | 0          | 0                | 0          | 0          | 0                | 0              | 0     |
|                                | Bare soil & rock | 0                              | 0          | 0          | 0       | 0          | 0          | 0          | 0                | 0          | 0          | 1                | 0              | 1     |
| Perm. snow/ice                 | 0                | 0                              | 0          | 0          | 0       | 0          | 0          | 0          | 0                | 0          | 0          | 0                | 0              |       |
| Total                          | 1                | 57                             | 3          | 1          | 11      | 207        | 8          | 94         | 184              | 0          | 255        | 28               | 849            |       |

157

158

159 **Table S7b.** Confusion matrix for vegetation classification in 3×3 km gridcells for a 90×90 km area  
 160 around Vindeln, simulations for 1995-2004 compared to the satellite-based GLCE product for 2000  
 161 and simulations 2091-2100. Classes that were not simulated (e.g. cropland and urban) or prescribed  
 162 (wetlands and water) were not included. The total number of comparisons are higher for LPJ-GUESS  
 163 1995-2004 against 2091-2100 than for comparison with the satellite-based class, as cells with a  
 164 satellite-based class that was not simulated (e.g. urban) were filtered out in that comparison.

|                                |                  | LPJ-Guess simulation 1995-2004 |            |            |         |            |            |            |                  |            |            |                  |                |       |
|--------------------------------|------------------|--------------------------------|------------|------------|---------|------------|------------|------------|------------------|------------|------------|------------------|----------------|-------|
|                                |                  | E. NL For.                     | D. BL For. | NL/BL For. | M. For. | BL/NL For. | BL D. shr. | NL e. shr. | Prost. shr. tun. | Sedge tun. | Shrub tun. | Bare soil & rock | Perm. snow/ice | Total |
| Satellite-based class 2000     | E. NL For.       | 234                            | 3          | 61         | 20      | 4          | 13         | 73         | 7                | 36         | 0          | 0                | 0              | 451   |
|                                | D. BL For.       | 4                              | 1          | 0          | 1       | 1          | 5          | 12         | 3                | 19         | 0          | 0                | 0              | 46    |
|                                | NL/BL For.       | 2                              | 0          | 0          | 1       | 0          | 0          | 1          | 0                | 0          | 0          | 0                | 0              | 4     |
|                                | M. For.          | 3                              | 0          | 0          | 0       | 0          | 0          | 1          | 0                | 1          | 0          | 0                | 0              | 5     |
|                                | BL/NL For.       | 1                              | 0          | 0          | 0       | 0          | 0          | 2          | 0                | 1          | 0          | 0                | 0              | 4     |
|                                | BL D. shr.       | 0                              | 0          | 0          | 0       | 0          | 4          | 3          | 0                | 15         | 0          | 0                | 0              | 22    |
|                                | NL e. shr.       | 0                              | 0          | 0          | 0       | 0          | 0          | 0          | 0                | 1          | 0          | 0                | 0              | 1     |
|                                | Prost. shr. tun. | 0                              | 0          | 0          | 0       | 0          | 4          | 0          | 0                | 13         | 0          | 5                | 0              | 22    |
|                                | Sedge tun.       | 0                              | 0          | 0          | 0       | 0          | 27         | 1          | 3                | 84         | 0          | 0                | 0              | 115   |
|                                | Shrub tun.       | 0                              | 0          | 0          | 0       | 0          | 34         | 9          | 7                | 79         | 0          | 1                | 0              | 130   |
|                                | Bare soil & rock | 0                              | 0          | 0          | 0       | 0          | 0          | 0          | 0                | 2          | 0          | 3                | 0              | 5     |
|                                | Perm. snow/ice   | 0                              | 0          | 0          | 0       | 0          | 0          | 0          | 0                | 0          | 0          | 0                | 0              | 0     |
|                                | Total            |                                | 244        | 4          | 61      | 22         | 5          | 87         | 102              | 20         | 251        | 0                | 9              | 0     |
| LPJ-Guess simulation 2091-2100 | E. NL For.       | 262                            | 0          | 62         | 20      | 3          | 47         | 109        | 19               | 181        | 0          | 0                | 0              | 703   |
|                                | D. BL For.       | 0                              | 0          | 0          | 0       | 0          | 0          | 0          | 0                | 1          | 0          | 1                | 0              | 2     |
|                                | NL/BL For.       | 6                              | 3          | 0          | 2       | 3          | 12         | 1          | 0                | 1          | 0          | 0                | 0              | 28    |
|                                | M. For.          | 0                              | 2          | 0          | 0       | 0          | 0          | 0          | 0                | 0          | 0          | 0                | 0              | 2     |
|                                | BL/NL For.       | 0                              | 0          | 0          | 0       | 0          | 0          | 0          | 0                | 0          | 0          | 0                | 0              | 0     |
|                                | BL D. shr.       | 0                              | 0          | 0          | 0       | 0          | 0          | 0          | 0                | 0          | 0          | 0                | 0              | 0     |
|                                | NL e. shr.       | 0                              | 0          | 0          | 0       | 0          | 36         | 1          | 3                | 83         | 0          | 8                | 0              | 131   |
|                                | Prost. shr. tun. | 0                              | 0          | 0          | 0       | 0          | 0          | 0          | 0                | 0          | 0          | 0                | 0              | 0     |
|                                | Sedge tun.       | 0                              | 0          | 0          | 0       | 0          | 0          | 0          | 0                | 13         | 0          | 0                | 0              | 13    |
|                                | Shrub tun.       | 0                              | 0          | 0          | 0       | 0          | 0          | 0          | 0                | 0          | 0          | 0                | 0              | 0     |
|                                | Bare soil & rock | 0                              | 0          | 0          | 0       | 0          | 0          | 0          | 0                | 0          | 0          | 0                | 0              | 0     |
|                                | Perm. snow/ice   | 0                              | 0          | 0          | 0       | 0          | 0          | 0          | 0                | 0          | 0          | 0                | 0              | 0     |
|                                | Total            |                                | 268        | 5          | 62      | 22         | 6          | 95         | 111              | 22         | 279        | 0                | 9              | 0     |

165

166

167 **Table S7c.** Confusion matrix for vegetation classification in 3×3 km gridcells for a 90×90 km area  
 168 around Helags, simulations for 1995-2004 compared to the satellite-based GLCE product for 2000  
 169 and simulations 2091-2100. Classes that were not simulated (e.g. cropland and urban) or prescribed  
 170 (wetlands and water) were not included. The total number of comparisons are higher for LPJ-GUESS  
 171 1995-2004 against 2091-2100 than for comparison with the satellite-based class, as cells with a  
 172 satellite-based class that was not simulated (e.g. urban) were filtered out in that comparison.

|                                |                  | LPJ-Guess simulation 1995-2004 |            |            |         |            |            |            |                  |            |            |                  |                |       |
|--------------------------------|------------------|--------------------------------|------------|------------|---------|------------|------------|------------|------------------|------------|------------|------------------|----------------|-------|
|                                |                  | E. NL For.                     | D. BL For. | NL/BL For. | M. For. | BL/NL For. | BL D. shr. | NL e. shr. | Prost. shr. tun. | Sedge tun. | Shrub tun. | Bare soil & rock | Perm. snow/ice | Total |
| Satellite-based class 2000     | E. NL For.       | 349                            | 0          | 22         | 3       | 0          | 0          | 9          | 0                | 9          | 0          | 0                | 0              | 392   |
|                                | D. BL For.       | 43                             | 0          | 0          | 0       | 0          | 0          | 0          | 0                | 0          | 0          | 0                | 0              | 43    |
|                                | NL/BL For.       | 16                             | 0          | 0          | 0       | 0          | 0          | 0          | 0                | 0          | 0          | 0                | 0              | 16    |
|                                | M. For.          | 11                             | 0          | 0          | 0       | 0          | 0          | 0          | 0                | 0          | 0          | 0                | 0              | 11    |
|                                | BL/NL For.       | 0                              | 0          | 0          | 0       | 0          | 0          | 0          | 0                | 0          | 0          | 0                | 0              | 0     |
|                                | BL D. shr.       | 7                              | 0          | 0          | 0       | 0          | 0          | 1          | 0                | 0          | 0          | 0                | 0              | 8     |
|                                | NL e. shr.       | 0                              | 0          | 0          | 0       | 0          | 0          | 0          | 0                | 0          | 0          | 0                | 0              | 0     |
|                                | Prost. shr. tun. | 0                              | 0          | 0          | 0       | 0          | 5          | 0          | 1                | 12         | 0          | 1                | 0              | 19    |
|                                | Sedge tun.       | 1                              | 0          | 0          | 1       | 0          | 18         | 29         | 2                | 82         | 0          | 0                | 0              | 133   |
|                                | Shrub tun.       | 45                             | 0          | 2          | 1       | 0          | 20         | 52         | 4                | 97         | 0          | 2                | 0              | 223   |
|                                | Bare soil & rock | 0                              | 0          | 0          | 0       | 0          | 0          | 0          | 0                | 0          | 0          | 1                | 0              | 1     |
|                                | Perm. snow/ice   | 0                              | 0          | 0          | 0       | 0          | 0          | 0          | 0                | 0          | 0          | 0                | 0              | 0     |
|                                | Total            | 472                            | 0          | 24         | 5       | 0          | 43         | 91         | 7                | 200        | 0          | 4                | 0              | 846   |
| LPJ-Guess simulation 2091-2100 | E. NL For.       | 468                            | 0          | 27         | 6       | 0          | 27         | 93         | 5                | 157        | 0          | 0                | 0              | 783   |
|                                | D. BL For.       | 0                              | 0          | 0          | 0       | 0          | 0          | 0          | 0                | 0          | 0          | 0                | 0              | 0     |
|                                | NL/BL For.       | 26                             | 0          | 0          | 0       | 0          | 0          | 0          | 0                | 0          | 0          | 0                | 0              | 26    |
|                                | M. For.          | 15                             | 0          | 0          | 0       | 0          | 0          | 0          | 0                | 0          | 0          | 0                | 0              | 15    |
|                                | BL/NL For.       | 2                              | 0          | 0          | 0       | 0          | 0          | 0          | 0                | 0          | 0          | 0                | 0              | 2     |
|                                | BL D. shr.       | 0                              | 0          | 0          | 0       | 0          | 0          | 0          | 0                | 0          | 0          | 0                | 0              | 0     |
|                                | NL e. shr.       | 0                              | 0          | 0          | 0       | 0          | 16         | 0          | 2                | 46         | 0          | 4                | 0              | 68    |
|                                | Prost. shr. tun. | 0                              | 0          | 0          | 0       | 0          | 0          | 0          | 0                | 0          | 0          | 0                | 0              | 0     |
|                                | Sedge tun.       | 0                              | 0          | 0          | 0       | 0          | 0          | 0          | 0                | 3          | 0          | 0                | 0              | 3     |
|                                | Shrub tun.       | 0                              | 0          | 0          | 0       | 0          | 0          | 0          | 0                | 0          | 0          | 0                | 0              | 0     |
|                                | Bare soil & rock | 0                              | 0          | 0          | 0       | 0          | 0          | 0          | 0                | 0          | 0          | 0                | 0              | 0     |
|                                | Perm. snow/ice   | 0                              | 0          | 0          | 0       | 0          | 0          | 0          | 0                | 0          | 0          | 0                | 0              | 0     |
|                                | Total            | 511                            | 0          | 27         | 6       | 0          | 43         | 93         | 7                | 206        | 0          | 4                | 0              | 897   |

173

174

175 **Table S7d.** Confusion matrix for vegetation classification in 3×3 km gridcells for a 90×90 km area  
 176 around Fulu, simulations for 1995-2004 compared to the satellite-based GLCE product for 2000 and  
 177 simulations 2091-2100. Classes that were not simulated (e.g. cropland and urban) or prescribed  
 178 (wetlands and water) were not included. The total number of comparisons are higher for LPJ-GUESS  
 179 1995-2004 against 2091-2100 than for comparison with the satellite-based class, as cells with a  
 180 satellite-based class that was not simulated (e.g. urban) were filtered out in that comparison.

|                                |                  | LPJ-Guess simulation 1995-2004 |            |            |         |            |            |            |                  |            |            |                  |                |       |
|--------------------------------|------------------|--------------------------------|------------|------------|---------|------------|------------|------------|------------------|------------|------------|------------------|----------------|-------|
|                                |                  | E. NL For.                     | D. BL For. | NL/BL For. | M. For. | BL/NL For. | BL D. shr. | NL e. shr. | Prost. shr. tun. | Sedge tun. | Shrub tun. | Bare soil & rock | Perm. snow/ice | Total |
| Satellite-based class 2000     | E. NL For.       | 679                            | 0          | 41         | 2       | 0          | 0          | 0          | 0                | 0          | 0          | 0                | 0              | 722   |
|                                | D. BL For.       | 7                              | 0          | 0          | 0       | 0          | 0          | 0          | 0                | 0          | 0          | 0                | 0              | 7     |
|                                | NL/BL For.       | 6                              | 0          | 0          | 0       | 0          | 0          | 0          | 0                | 0          | 0          | 0                | 0              | 6     |
|                                | M. For.          | 1                              | 0          | 1          | 0       | 0          | 0          | 0          | 0                | 0          | 0          | 0                | 0              | 2     |
|                                | BL/NL For.       | 0                              | 0          | 0          | 0       | 0          | 0          | 0          | 0                | 0          | 0          | 0                | 0              | 0     |
|                                | BL D. shr.       | 1                              | 0          | 0          | 0       | 0          | 0          | 0          | 0                | 0          | 0          | 0                | 0              | 1     |
|                                | NL e. shr.       | 0                              | 0          | 0          | 0       | 0          | 0          | 0          | 0                | 0          | 0          | 0                | 0              | 0     |
|                                | Prost. shr. tun. | 0                              | 0          | 0          | 0       | 0          | 0          | 0          | 0                | 0          | 0          | 0                | 0              | 0     |
|                                | Sedge tun.       | 9                              | 0          | 0          | 0       | 0          | 0          | 3          | 0                | 1          | 0          | 0                | 0              | 13    |
|                                | Shrub tun.       | 60                             | 0          | 3          | 0       | 0          | 0          | 7          | 0                | 3          | 0          | 0                | 0              | 73    |
|                                | Bare soil & rock | 0                              | 0          | 0          | 0       | 0          | 0          | 0          | 0                | 0          | 0          | 0                | 0              | 0     |
|                                | Perm. snow/ice   | 0                              | 0          | 0          | 0       | 0          | 0          | 0          | 0                | 0          | 0          | 0                | 0              | 0     |
|                                | Total            | 763                            | 0          | 45         | 2       | 0          | 0          | 10         | 0                | 4          | 0          | 0                | 0              | 824   |
| LPJ-Guess simulation 2091-2100 | E. NL For.       | 545                            | 0          | 24         | 0       | 0          | 0          | 10         | 0                | 4          | 0          | 0                | 0              | 583   |
|                                | D. BL For.       | 0                              | 0          | 0          | 0       | 0          | 0          | 0          | 0                | 0          | 0          | 0                | 0              | 0     |
|                                | NL/BL For.       | 217                            | 0          | 12         | 1       | 0          | 0          | 0          | 0                | 0          | 0          | 0                | 0              | 230   |
|                                | M. For.          | 52                             | 0          | 11         | 0       | 0          | 0          | 0          | 0                | 0          | 0          | 0                | 0              | 63    |
|                                | BL/NL For.       | 1                              | 0          | 0          | 1       | 0          | 0          | 0          | 0                | 0          | 0          | 0                | 0              | 2     |
|                                | BL D. shr.       | 0                              | 0          | 0          | 0       | 0          | 0          | 0          | 0                | 0          | 0          | 0                | 0              | 0     |
|                                | NL e. shr.       | 0                              | 0          | 0          | 0       | 0          | 0          | 0          | 0                | 0          | 0          | 0                | 0              | 0     |
|                                | Prost. shr. tun. | 0                              | 0          | 0          | 0       | 0          | 0          | 0          | 0                | 0          | 0          | 0                | 0              | 0     |
|                                | Sedge tun.       | 0                              | 0          | 0          | 0       | 0          | 0          | 0          | 0                | 0          | 0          | 0                | 0              | 0     |
|                                | Shrub tun.       | 0                              | 0          | 0          | 0       | 0          | 0          | 0          | 0                | 0          | 0          | 0                | 0              | 0     |
|                                | Bare soil & rock | 0                              | 0          | 0          | 0       | 0          | 0          | 0          | 0                | 0          | 0          | 0                | 0              | 0     |
|                                | Perm. snow/ice   | 0                              | 0          | 0          | 0       | 0          | 0          | 0          | 0                | 0          | 0          | 0                | 0              | 0     |
|                                | Total            | 815                            | 0          | 47         | 2       | 0          | 0          | 10         | 0                | 4          | 0          | 0                | 0              | 878   |

181

182

183 **Table S7e.** Confusion matrix for vegetation classification in 3×3 km gridcells for a 90×90 km area  
 184 around Muddus, simulations for 1995-2004 compared to the satellite-based GLCE product for 2000  
 185 and simulations 2091-2100. Classes that were not simulated (e.g. cropland and urban) or prescribed  
 186 (wetlands and water) were not included. The total number of comparisons are higher for LPJ-GUESS  
 187 1995-2004 against 2091-2100 than for comparison with the satellite-based class, as cells with a  
 188 satellite-based class that was not simulated (e.g. urban) were filtered out in that comparison.

|                                |                  | LPJ-Guess simulation 1995-2004 |            |            |         |            |            |            |                  |            |            |                  |                |       |
|--------------------------------|------------------|--------------------------------|------------|------------|---------|------------|------------|------------|------------------|------------|------------|------------------|----------------|-------|
|                                |                  | E. NL For.                     | D. BL For. | NL/BL For. | M. For. | BL/NL For. | BL D. shr. | NL e. shr. | Prost. shr. tun. | Sedge tun. | Shrub tun. | Bare soil & rock | Perm. snow/ice | Total |
| Satellite-based class 2000     | E. NL For.       | 628                            | 4          | 39         | 17      | 8          | 3          | 5          | 0                | 0          | 0          | 0                | 0              | 704   |
|                                | D. BL For.       | 5                              | 0          | 0          | 0       | 0          | 0          | 0          | 0                | 0          | 0          | 0                | 0              | 5     |
|                                | NL/BL For.       | 4                              | 0          | 0          | 0       | 0          | 0          | 0          | 0                | 0          | 0          | 0                | 0              | 4     |
|                                | M. For.          | 1                              | 0          | 0          | 0       | 0          | 0          | 0          | 0                | 0          | 0          | 0                | 0              | 1     |
|                                | BL/NL For.       | 0                              | 0          | 0          | 0       | 0          | 0          | 0          | 0                | 0          | 0          | 0                | 0              | 0     |
|                                | BL D. shr.       | 0                              | 0          | 0          | 0       | 0          | 0          | 0          | 0                | 0          | 0          | 0                | 0              | 0     |
|                                | NL e. shr.       | 0                              | 0          | 0          | 0       | 0          | 0          | 0          | 0                | 0          | 0          | 0                | 0              | 0     |
|                                | Prost. shr. tun. | 0                              | 0          | 0          | 0       | 0          | 0          | 0          | 0                | 0          | 0          | 0                | 0              | 0     |
|                                | Sedge tun.       | 0                              | 0          | 0          | 0       | 0          | 0          | 0          | 0                | 0          | 0          | 0                | 0              | 0     |
|                                | Shrub tun.       | 3                              | 1          | 0          | 0       | 1          | 1          | 0          | 0                | 0          | 0          | 0                | 0              | 6     |
|                                | Bare soil & rock | 1                              | 0          | 0          | 0       | 0          | 0          | 0          | 0                | 0          | 0          | 0                | 0              | 1     |
|                                | Perm. snow/ice   | 0                              | 0          | 0          | 0       | 0          | 0          | 0          | 0                | 0          | 0          | 0                | 0              | 0     |
|                                | Total            | 642                            | 5          | 39         | 17      | 9          | 4          | 5          | 0                | 0          | 0          | 0                | 0              | 721   |
| LPJ-Guess simulation 2091-2100 | E. NL For.       | 568                            | 0          | 15         | 4       | 1          | 0          | 5          | 0                | 0          | 0          | 0                | 0              | 593   |
|                                | D. BL For.       | 0                              | 0          | 0          | 0       | 0          | 0          | 0          | 0                | 0          | 0          | 0                | 0              | 0     |
|                                | NL/BL For.       | 91                             | 1          | 7          | 5       | 6          | 3          | 0          | 0                | 0          | 0          | 0                | 0              | 113   |
|                                | M. For.          | 12                             | 4          | 18         | 8       | 2          | 1          | 0          | 0                | 0          | 0          | 0                | 0              | 45    |
|                                | BL/NL For.       | 0                              | 0          | 1          | 0       | 0          | 0          | 0          | 0                | 0          | 0          | 0                | 0              | 1     |
|                                | BL D. shr.       | 0                              | 0          | 0          | 0       | 0          | 0          | 0          | 0                | 0          | 0          | 0                | 0              | 0     |
|                                | NL e. shr.       | 0                              | 0          | 0          | 0       | 0          | 0          | 0          | 0                | 0          | 0          | 0                | 0              | 0     |
|                                | Prost. shr. tun. | 0                              | 0          | 0          | 0       | 0          | 0          | 0          | 0                | 0          | 0          | 0                | 0              | 0     |
|                                | Sedge tun.       | 0                              | 0          | 0          | 0       | 0          | 0          | 0          | 0                | 0          | 0          | 0                | 0              | 0     |
|                                | Shrub tun.       | 0                              | 0          | 0          | 0       | 0          | 0          | 0          | 0                | 0          | 0          | 0                | 0              | 0     |
|                                | Bare soil & rock | 0                              | 0          | 0          | 0       | 0          | 0          | 0          | 0                | 0          | 0          | 0                | 0              | 0     |
|                                | Perm. snow/ice   | 0                              | 0          | 0          | 0       | 0          | 0          | 0          | 0                | 0          | 0          | 0                | 0              | 0     |
|                                | Total            | 671                            | 5          | 41         | 17      | 9          | 4          | 5          | 0                | 0          | 0          | 0                | 0              | 752   |

189

190



191 **Table S7f.** Confusion matrix for vegetation classification in 3×3 km gridcells for a 90×90 km area  
 192 around Björnlandet, simulations for 1995-2004 compared to the satellite-based GLCE product for  
 193 2000 and simulations 2091-2100. Classes that were not simulated (e.g. cropland and urban) or  
 194 prescribed (wetlands and water) were not included. The total number of comparisons are higher for  
 195 LPJ-GUESS 1995-2004 against 2091-2100 than for comparison with the satellite-based class, as cells  
 196 with a satellite-based class that was not simulated (e.g. urban) were filtered out in that comparison.

|                                |                  | LPJ-Guess simulation 1995-2004 |            |            |         |            |            |            |                  |            |            |                  |                |       |
|--------------------------------|------------------|--------------------------------|------------|------------|---------|------------|------------|------------|------------------|------------|------------|------------------|----------------|-------|
|                                |                  | E. NL For.                     | D. BL For. | NL/BL For. | M. For. | BL/NL For. | BL D. shr. | NL e. shr. | Prost. shr. tun. | Sedge tun. | Shrub tun. | Bare soil & rock | Perm. snow/ice | Total |
| Satellite-based class 2000     | E. NL For.       | 189                            | 0          | 263        | 153     | 35         | 0          | 0          | 0                | 0          | 0          | 0                | 0              | 640   |
|                                | D. BL For.       | 67                             | 0          | 19         | 1       | 0          | 0          | 0          | 0                | 0          | 0          | 0                | 0              | 87    |
|                                | NL/BL For.       | 21                             | 0          | 29         | 5       | 1          | 0          | 0          | 0                | 0          | 0          | 0                | 0              | 56    |
|                                | M. For.          | 7                              | 0          | 6          | 0       | 0          | 0          | 0          | 0                | 0          | 0          | 0                | 0              | 13    |
|                                | BL/NL For.       | 15                             | 0          | 12         | 3       | 0          | 0          | 0          | 0                | 0          | 0          | 0                | 0              | 30    |
|                                | BL D. shr.       | 0                              | 0          | 0          | 0       | 0          | 0          | 0          | 0                | 0          | 0          | 0                | 0              | 0     |
|                                | NL e. shr.       | 0                              | 0          | 0          | 0       | 0          | 0          | 0          | 0                | 0          | 0          | 0                | 0              | 0     |
|                                | Prost. shr. tun. | 0                              | 0          | 0          | 0       | 0          | 0          | 0          | 0                | 0          | 0          | 0                | 0              | 0     |
|                                | Sedge tun.       | 0                              | 0          | 0          | 0       | 0          | 0          | 0          | 0                | 0          | 0          | 0                | 0              | 0     |
|                                | Shrub tun.       | 0                              | 0          | 0          | 0       | 0          | 0          | 0          | 0                | 0          | 0          | 0                | 0              | 0     |
|                                | Bare soil & rock | 0                              | 0          | 0          | 0       | 0          | 0          | 0          | 0                | 0          | 0          | 0                | 0              | 0     |
|                                | Perm. snow/ice   | 0                              | 0          | 0          | 0       | 0          | 0          | 0          | 0                | 0          | 0          | 0                | 0              | 0     |
|                                | Total            |                                | 299        | 0          | 329     | 162        | 36         | 0          | 0                | 0          | 0          | 0                | 0              | 0     |
| LPJ-Guess simulation 2091-2100 | E. NL For.       | 106                            | 0          | 13         | 0       | 0          | 0          | 0          | 0                | 0          | 0          | 0                | 0              | 119   |
|                                | D. BL For.       | 0                              | 0          | 0          | 3       | 0          | 0          | 0          | 0                | 0          | 0          | 0                | 0              | 3     |
|                                | NL/BL For.       | 143                            | 0          | 108        | 15      | 1          | 0          | 0          | 0                | 0          | 0          | 0                | 0              | 267   |
|                                | M. For.          | 58                             | 0          | 180        | 101     | 14         | 0          | 0          | 0                | 0          | 0          | 0                | 0              | 353   |
|                                | BL/NL For.       | 11                             | 0          | 35         | 49      | 21         | 0          | 0          | 0                | 0          | 0          | 0                | 0              | 116   |
|                                | BL D. shr.       | 0                              | 0          | 0          | 0       | 0          | 0          | 0          | 0                | 0          | 0          | 0                | 0              | 0     |
|                                | NL e. shr.       | 0                              | 0          | 0          | 0       | 0          | 0          | 0          | 0                | 0          | 0          | 0                | 0              | 0     |
|                                | Prost. shr. tun. | 0                              | 0          | 0          | 0       | 0          | 0          | 0          | 0                | 0          | 0          | 0                | 0              | 0     |
|                                | Sedge tun.       | 0                              | 0          | 0          | 0       | 0          | 0          | 0          | 0                | 0          | 0          | 0                | 0              | 0     |
|                                | Shrub tun.       | 0                              | 0          | 0          | 0       | 0          | 0          | 0          | 0                | 0          | 0          | 0                | 0              | 0     |
|                                | Bare soil & rock | 0                              | 0          | 0          | 0       | 0          | 0          | 0          | 0                | 0          | 0          | 0                | 0              | 0     |
|                                | Perm. snow/ice   | 0                              | 0          | 0          | 0       | 0          | 0          | 0          | 0                | 0          | 0          | 0                | 0              | 0     |
|                                | Total            |                                | 318        | 0          | 336     | 168        | 36         | 0          | 0                | 0          | 0          | 0                | 0              | 0     |

197

198

199 **S8. Simulated potential reindeer consumption in Sweden by**  
 200 **reindeer-herding communities**  
 201

202 **Table S8.** Change in simulated potential reindeer consumption of leaf biomass (g C m<sup>-2</sup> yr<sup>-1</sup>) in the 51  
 203 reindeer-herding communities in Sweden from the 1995-2004 period, for the different seasonal  
 204 grazing grounds. The districts are sorted from north to south.

|                     | Spring    |           |           | Summer    |           |           | Autumn    |           |           | Winter    |           |           |
|---------------------|-----------|-----------|-----------|-----------|-----------|-----------|-----------|-----------|-----------|-----------|-----------|-----------|
|                     | 2013-2022 | 2041-2050 | 2091-2100 | 2013-2022 | 2041-2050 | 2091-2100 | 2013-2022 | 2041-2050 | 2091-2100 | 2013-2022 | 2041-2050 | 2091-2100 |
| Könskämä            | 0.52      | 0.78      | 0.80      | 0.54      | 0.90      | 1.12      | 0.26      | 0.46      | 0.15      | -0.15     | -0.19     | 0.11      |
| Lainiovuoma         | 0.56      | 0.80      | 0.58      | 0.56      | 0.86      | 0.70      | 0.15      | 0.36      | 0.14      | -0.12     | 0.08      | 0.46      |
| Saarivuoma          | 0.31      | 0.64      | 1.16      | 0.26      | 0.58      | 1.44      | 0.28      | 0.61      | 1.05      | -0.09     | 0.11      | 0.26      |
| Talma               | -0.03     | 0.13      | 0.22      | 0.27      | 0.66      | 0.93      | 0.15      | 0.44      | 0.64      | -0.09     | 0.00      | 0.17      |
| Gabna               | 0.26      | 0.52      | 0.67      | 0.19      | 0.47      | 2.07      | 0.26      | 0.52      | 0.67      | -0.16     | -0.02     | 0.37      |
| Laevas              | 0.58      | 0.88      | 0.77      | 0.14      | 0.33      | 2.11      | 0.40      | 0.66      | 0.68      | -0.09     | 0.02      | 0.47      |
| Girjas              | 0.33      | 0.56      | 0.65      | 0.39      | 0.65      | 1.43      | 0.31      | 0.53      | 0.36      | -0.10     | 0.02      | 0.50      |
| Baste cearru        | 0.23      | 0.53      | 0.46      | 0.17      | 0.58      | 1.75      | 0.17      | 0.42      | 0.43      | -0.04     | 0.11      | 0.25      |
| Unna Tjerusj        | 0.37      | 0.63      | 1.42      | 0.35      | 0.60      | 1.57      | 0.24      | 0.44      | 0.73      | 0.07      | 0.22      | 0.65      |
| Sirges              | 0.35      | 0.52      | 0.83      | 0.33      | 0.55      | 1.13      | 0.37      | 0.53      | 0.49      | 0.05      | 0.12      | 0.25      |
| Jåhkågaska tjiellde | 0.29      | 0.31      | 0.77      | 0.28      | 0.47      | 1.67      | 0.33      | 0.38      | 0.86      | 0.07      | 0.11      | 0.27      |
| Tuorpon             | 0.28      | 0.40      | 0.68      | 0.28      | 0.46      | 0.88      | 0.26      | 0.36      | 0.48      | 0.00      | 0.05      | 0.06      |
| Luokta-mávas        | 0.40      | 0.43      | 0.13      | 0.35      | 0.48      | 0.60      | 0.31      | 0.32      | 0.07      | -0.15     | -0.10     | -0.03     |
| Semisjaur-Njarg     | 0.44      | 0.54      | 0.38      | 0.43      | 0.61      | 0.89      | 0.35      | 0.43      | 0.37      | -0.05     | -0.07     | -0.50     |
| Svaipa              | 0.34      | 0.31      | 0.26      | 0.40      | 0.63      | 0.97      | 0.32      | 0.28      | 0.25      | -0.16     | -0.21     | -0.46     |
| Vittangi            | -0.13     | -0.07     | 0.25      | -0.14     | 0.03      | 0.31      | -0.06     | 0.15      | 0.41      | -0.08     | -0.06     | 0.48      |
| Gällivare           | -0.03     | 0.19      | 0.50      | -0.06     | 0.23      | 0.77      | -0.05     | 0.19      | 0.64      | -0.08     | 0.05      | -0.08     |
| Serri               | 0.27      | 0.65      | 0.46      | 0.07      | 0.33      | 0.51      | 0.07      | 0.33      | 0.51      | 0.09      | 0.26      | 0.25      |
| Udtja               | 0.06      | 0.02      | 0.26      | -0.01     | 0.08      | 0.00      | 0.03      | 0.12      | 0.08      | 0.01      | 0.05      | -0.34     |
| Ståkke              | -0.06     | -0.10     | 0.24      | -0.06     | -0.10     | 0.24      | -0.06     | -0.10     | 0.25      | -0.10     | -0.10     | 0.08      |
| Maskaure            | -0.05     | -0.08     | 0.82      | -0.03     | -0.20     | 0.53      | -0.14     | -0.25     | 0.36      | -0.13     | -0.31     | -0.02     |
| Östra kikkejaure    | -0.06     | 0.14      | 0.57      | -0.05     | 0.13      | 0.71      | -0.06     | 0.14      | 0.57      | -0.07     | 0.11      | 0.18      |
| Västra kikkejaure   | -0.13     | -0.08     | 0.57      | -0.13     | -0.08     | 0.57      | -0.12     | -0.06     | 0.61      | -0.22     | -0.16     | -0.46     |
| Mausjaure           | -0.08     | 0.03      | 0.83      | -0.08     | 0.03      | 0.83      | -0.16     | 0.06      | 0.18      | -0.19     | -0.18     | -0.35     |
| Muonio              | -0.09     | 0.08      | 0.46      | -0.09     | 0.08      | 0.46      | -0.13     | -0.03     | 0.48      | -0.06     | -0.03     | 0.43      |
| Sattajärvi          | -0.15     | 0.11      | 0.42      | -0.12     | 0.13      | 0.36      | -0.10     | 0.15      | 0.46      | 0.08      | 0.29      | 0.66      |
| Tärendö             | 0.00      | 0.00      | 0.00      | -0.06     | 0.13      | 0.75      | 0.02      | 0.20      | 0.71      | -0.02     | 0.16      | 0.52      |
| Kalix               | -0.04     | -0.02     | -0.15     | -0.04     | -0.02     | -0.15     | -0.04     | -0.02     | -0.15     | -0.13     | -0.11     | -0.49     |
| Pirttijärvi         | -0.02     | 0.23      | 0.35      | -0.02     | 0.23      | 0.35      | -0.06     | 0.09      | 0.10      | -0.09     | 0.01      | -0.18     |
| Liehattjäjä         | -0.33     | 0.13      | -0.64     | -0.10     | -0.14     | -0.16     | -0.09     | -0.07     | -0.20     | -0.27     | -0.35     | -0.46     |
| Ängeså              | -0.13     | 0.23      | 0.39      | 0.07      | 0.36      | 0.59      | 0.01      | 0.21      | 0.19      | -0.07     | 0.11      | 0.14      |
| Korju               | 0.01      | 0.07      | 0.14      | 0.01      | 0.07      | 0.14      | 0.01      | 0.07      | 0.14      | -0.13     | -0.15     | -0.26     |
| Vilhelmina south    | 0.16      | 0.17      | 0.15      | 0.49      | 0.58      | 0.32      | 0.32      | 0.33      | 0.24      | -0.17     | -0.26     | -0.45     |

|                  |       |       |       |       |       |       |       |       |       |       |       |       |
|------------------|-------|-------|-------|-------|-------|-------|-------|-------|-------|-------|-------|-------|
| Vilhelmina north | 0.20  | 0.15  | 0.23  | 0.43  | 0.59  | 0.23  | 0.24  | 0.23  | 0.21  | -0.17 | -0.33 | -0.48 |
| Ubmeje tjeälddie | 0.31  | 0.38  | 0.40  | 0.43  | 0.61  | 0.71  | 0.40  | 0.47  | 0.39  | -0.12 | -0.11 | -0.25 |
| Vapsten          | 0.28  | 0.32  | 0.27  | 0.28  | 0.32  | 0.27  | 0.27  | 0.32  | 0.27  | 0.04  | 0.06  | 0.06  |
| Ran              | 0.43  | 0.56  | 0.48  | 0.57  | 0.88  | 0.67  | 0.45  | 0.58  | 0.45  | -0.21 | -0.24 | -0.47 |
| Gran             | 0.47  | 0.58  | 0.49  | 0.59  | 0.80  | 0.83  | 0.49  | 0.67  | 0.79  | -0.10 | -0.17 | -0.41 |
| Malå             | -0.05 | 0.10  | 0.11  | -0.07 | 0.09  | 0.17  | -0.07 | 0.08  | 0.19  | -0.18 | -0.23 | -0.40 |
| Voernese         | 0.44  | 0.50  | 0.44  | 0.48  | 0.55  | 0.35  | 0.46  | 0.48  | 0.25  | -0.11 | -0.23 | -0.37 |
| Ohredahke        | 0.38  | 0.26  | 0.30  | 0.38  | 0.26  | 0.27  | 0.38  | 0.26  | 0.30  | -0.12 | -0.17 | -0.35 |
| Raedtievaerie    | 0.11  | 0.01  | 0.25  | 0.42  | 0.34  | -0.09 | 0.38  | 0.29  | -0.09 | -0.22 | -0.16 | -0.34 |
| Jiingevaerie     | 0.33  | 0.49  | 0.26  | 0.38  | 0.74  | 0.55  | 0.19  | 0.11  | 0.19  | -0.14 | -0.13 | -0.30 |
| Jovnevaerie      | -0.15 | -0.11 | -0.23 | 0.35  | 0.35  | 0.20  | 0.19  | 0.16  | 0.23  | -0.21 | -0.17 | -0.31 |
| Njaarke          | 0.42  | 0.24  | 0.13  | 0.42  | 0.24  | 0.13  | 0.31  | 0.09  | 0.10  | -0.06 | -0.03 | -0.04 |
| Kall             | 0.23  | 0.08  | 0.52  | 0.23  | 0.08  | 0.52  | 0.20  | -0.04 | 0.47  | -0.02 | -0.06 | 0.31  |
| Handölsdalen     | 0.32  | 0.61  | 0.27  | 0.50  | 0.85  | 0.39  | 0.40  | 0.68  | 0.35  | 0.00  | -0.01 | -0.03 |
| Tåssåsen         | -0.01 | 0.31  | -0.13 | -0.04 | 0.31  | -0.12 | -0.11 | 0.26  | -0.24 | -0.17 | -0.09 | -0.05 |
| Mittådalen       | 0.19  | 0.49  | -0.01 | 0.38  | 0.82  | 0.28  | -0.25 | -0.11 | -0.04 | -0.15 | -0.12 | -0.01 |
| Ruvhten sijte    | -0.10 | 0.02  | -0.18 | 0.26  | 0.60  | -0.40 | -0.15 | -0.08 | -0.08 | -0.23 | -0.40 | -0.15 |
| ldre             | -0.10 | -0.09 | -0.14 | -0.10 | -0.09 | -0.13 | -0.04 | -0.04 | -0.30 | -0.13 | -0.14 | 0.03  |

205
